# Supplementary material for: Secondary Preventive Care for Cardiovascular Diseases in Bangladesh: A National Survey
Source: PubMed Central journal article supplement (PMC8086718; doi:10.5334/gh.953), 2021-04-30

Supplemental Figure 2: Responding center location by Bangladesh district

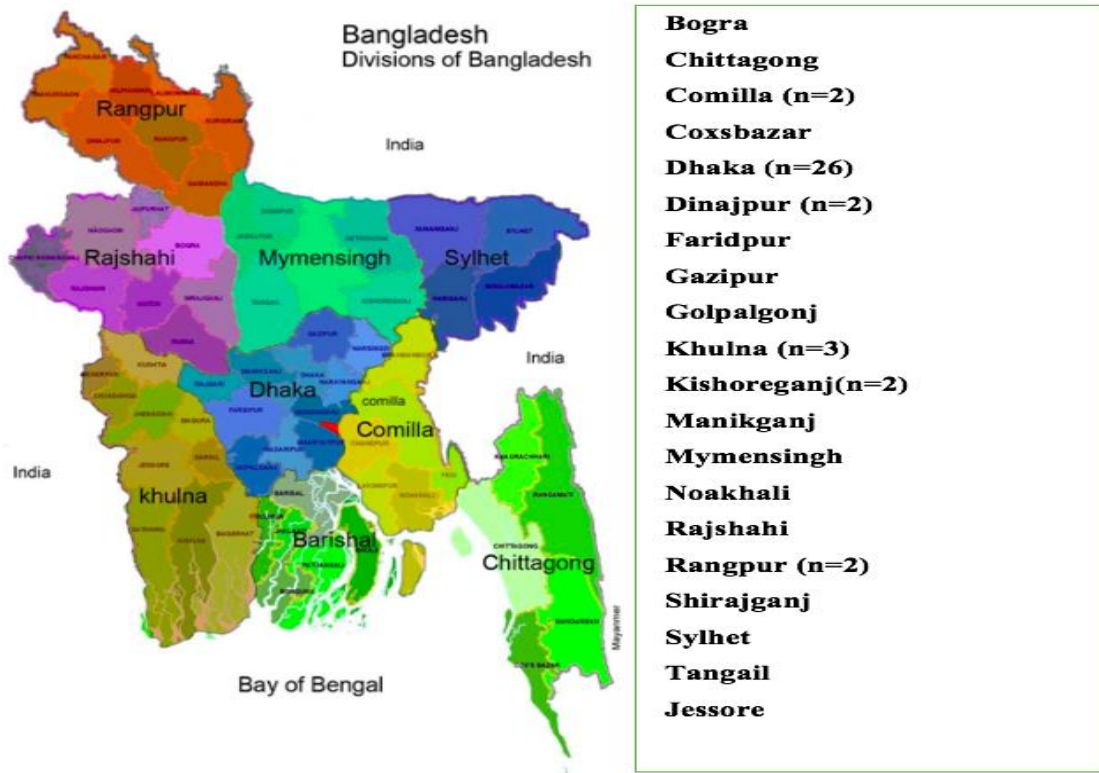

Supplement: gh-16-1-953-s2.pdf [file gh-16-1-953-s2.pdf]
