# Supplementary material for: Secondary Preventive Care for Cardiovascular Diseases in Bangladesh: A National Survey
Source: PubMed Central journal article supplement (PMC8086718; doi:10.5334/gh.953), 2021-04-30
Supplement: gh-16-1-953-s3.pdf [file gh-16-1-953-s3.pdf]

Supplemental Table 1. Cardiovascular disease risk factors assessed by cardiology centres

|                                         | N  | %     |
|-----------------------------------------|----|-------|
| Blood pressure                          | 51 | 100.0 |
| Total Cholesterol                       | 51 | 100.0 |
| Tobacco use                             | 50 | 98.0  |
| HDL, LDL Cholesterol                    | 50 | 98.0  |
| Triglycerides                           | 50 | 98.0  |
| HbA1c for diabetic patients             | 49 | 96.0  |
| Harmful use of alcohol                  | 47 | 92.1  |
| Time spent being sedentary              | 45 | 88.2  |
| Physical inactivity                     | 44 | 86.0  |
| Body mass index                         | 43 | 84.3  |
| Poor diet                               | 42 | 82.3  |
| Blood glucose for non-diabetic patients | 40 | 78.4  |
| Depression / anxiety                    | 32 | 62.7  |
| Waist circumference                     | 17 | 33.3  |
| Sleep apnea                             | 14 | 27.4  |
| Body composition                        | 12 | 23.5  |
| Other risk factor(s)                    | 0  | 0.0   |

Abbreviation: N= Number, %= Percentage.

HDL= High density lipoprotein, LDL= Low density lipoprotein
